# Supplementary material
Source: PubMed Central journal article supplement (PMC11140471)
Supplement: NIHMS1994708-supplement-supplemental_fig_4.pdf [file NIHMS1994708-supplement-supplemental_fig_4.pdf]

**X-Linked Genes Differentially Upregulated in NZM2328 Females**

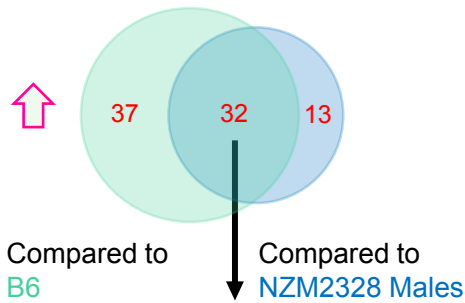

|                       |                     |                   |
|-----------------------|---------------------|-------------------|
| 2210013O21Rik         | <i>Iqsec2</i>       | <i>Gpr64</i>      |
| D330045A20Rik         | <i>Nhsl2</i>        | <i>Maged1</i>     |
| F630028O10Rik         | <b><i>Tlr13</i></b> | <i>Slc9a7</i>     |
| <b><i>Cybb</i></b>    | <i>Zmat1</i>        | <i>Xk</i>         |
| <b><i>Foxp3</i></b>   | <i>Bex4</i>         | <b><i>Cfp</i></b> |
| <b><i>Il13ra1</i></b> | <i>Dgkk</i>         | <i>Fam120c</i>    |
| <i>Maob</i>           | <i>Gpr34</i>        | <i>Gria3</i>      |
| <i>Tceal8</i>         | <b><i>Kdm6a</i></b> | <i>Magee2</i>     |
| <i>Zfp300</i>         | <i>Phka1</i>        | <i>Sytl4</i>      |
| <i>Arhgap6</i>        | <b><i>Tlr8</i></b>  | <i>Zdhhc15</i>    |
| <b><i>Gata1</i></b>   | <b><i>Btk</i></b>   |                   |

**X-Linked Genes Differentially Downregulated in NZM2328 Females**

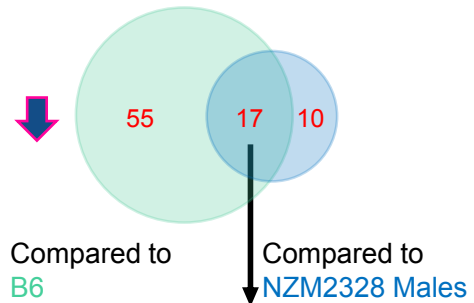

|                     |                    |
|---------------------|--------------------|
| 2010204K13Rik       | <i>Arxes2</i>      |
| <i>Chm</i>          | <i>Klhl15</i>      |
| <i>Pgk1</i>         | <i>Rbm3</i>        |
| <i>Slc7a3</i>       | <i>BC022960</i>    |
| A630033H20Rik       | <b><i>Maoa</i></b> |
| <i>Gpm6b</i>        | <i>Rnf113a1</i>    |
| <b><i>Pim2</i></b>  |                    |
| <i>Wdr45</i>        |                    |
| <i>Armcx6</i>       |                    |
| <b><i>Itm2a</i></b> |                    |
| <i>Rab33a</i>       |                    |
