# Supplementary material
Source: PubMed Central journal article supplement (PMC11140471)
Supplement: NIHMS1994708-supplement-supplemental_methods.pdf [file NIHMS1994708-supplement-supplemental_methods.pdf]

## Supplemental File

### Supplementary Figure Legends

**Supplementary Figure 1. Calculation of Xist RNA localization scores.** Xist RNA localization patterns in  $\geq 100$  lymphocyte nuclei per biological replicate were quantified as Types 1, 2, 3, or 4, reflecting Xist RNA transcripts that are completely dispersed from or tightly localized to the inactive X chromosome (Xi), respectively. Each “Type” pattern is depicted adjacent to the chart. The calculated Xist RNA localization score is a continuous variable spanning from 1 to 4, where 1.0 indicates that 100% of all nuclei have a Type 1 pattern where Xist RNA is completely dispersed or absent, and a score of 4.0 indicates that 100% of all nuclei show a Type 4 pattern where Xist RNA is tightly localized to the Xi, as described previously (referenced in the main text).

**Supplementary Figure 2. Quantitation of serum anti-dsDNA autoantibody concentrations from MRL/lpr and NZM2328 mice.** A. Median [interquartile range] serum anti-dsDNA concentration of female MRL/lpr mice stratified by mouse age: 8-10 weeks (n=6), 18-22 weeks (n=9),  $\geq 23$  weeks (n=9). Concentration values are expressed relative to the standard curve on an arbitrary scale. Serum from an aged female NZB/W F1 mouse was used as a positive control. Serum from an mb1cre<sup>+</sup> homozygous female mouse (B6 background) that lacks B cells was used as a negative control. All samples were evaluated on a single plate. B. Median [interquartile range] serum anti-dsDNA concentration of female NZM2328 mice stratified by mouse age: 8-10 weeks (n=6), 18-22 weeks (n=5),  $\geq 23$  weeks (n=11). Concentration values are expressed relative to the standard curve on an arbitrary scale. The concentration value from n=1 mouse  $\geq 23$  weeks of age exceeded the maximum value of the standard curve. Serum from another aged female NZB/W F1 mouse was used as a positive control. Serum from another mb1cre<sup>+</sup> homozygous female mouse (B6 background) which lacks B cells was used as a negative control. All samples

were evaluated on a single plate. \* =  $p < 0.05$ ; \*\* =  $p < 0.01$  by a nonparametric ANOVA amongst the three age groups, with adjustment for multiple comparisons testing using Dunn's multiple comparisons test.

**Supplementary Figure 3.** A. Linear regression of mouse age (weeks) versus Xist RNA localization score for non-activated (open) and activated (filled) CD23+ cells from each female B6 (green), MRL/lpr (orange), and NZM2328 (red) mouse, shown with the 95% confidence interval. B. Linear regression of mouse age (weeks) versus the percentage of nuclei with H3K27me3 foci for non-activated (open) and activated (filled) CD23+ cells from each female B6 (green), MRL/lpr (orange), and NZM2328 (red) mouse, shown with the 95% confidence interval. Statistical testing indicates the probability of a non-zero slope for each linear model by pure chance.

**Supplementary Figure 4.** List of differentially upregulated and differentially downregulated X-linked genes between *in vitro* activated T cells from female NZM2328 mice and those from both female B6 and male NZM2328 mice. Genes in bold have immune functions.
