# Supplementary material
Source: PubMed Central journal article supplement (PMC11140471)

A.

**[Anti-dsDNA] in  
MLR/lpr Female Mice**

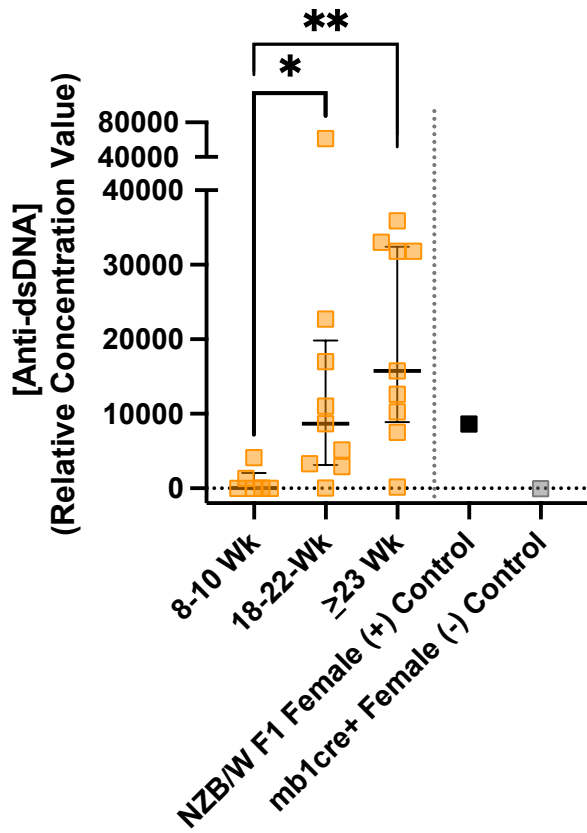

B.

**[Anti-dsDNA] in  
NZM2328 Female Mice**

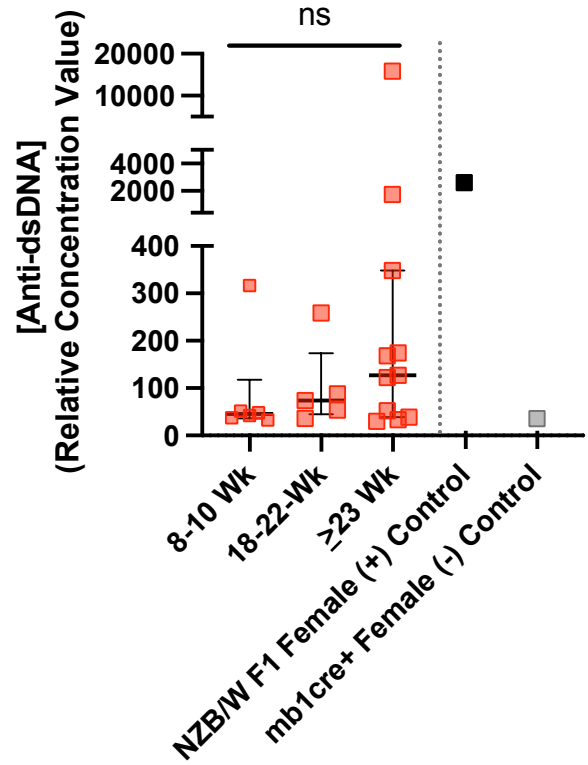

Supplement: NIHMS1994708-supplement-supplemental_fig_2.pdf [file NIHMS1994708-supplement-supplemental_fig_2.pdf]

A.

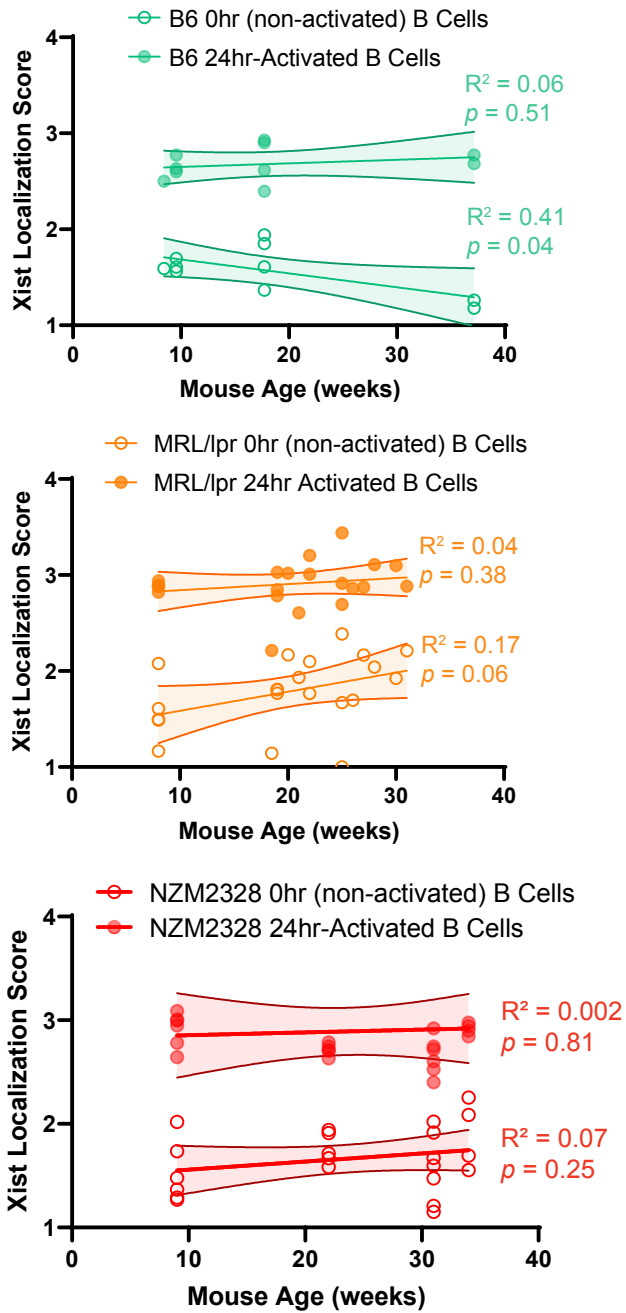

B.

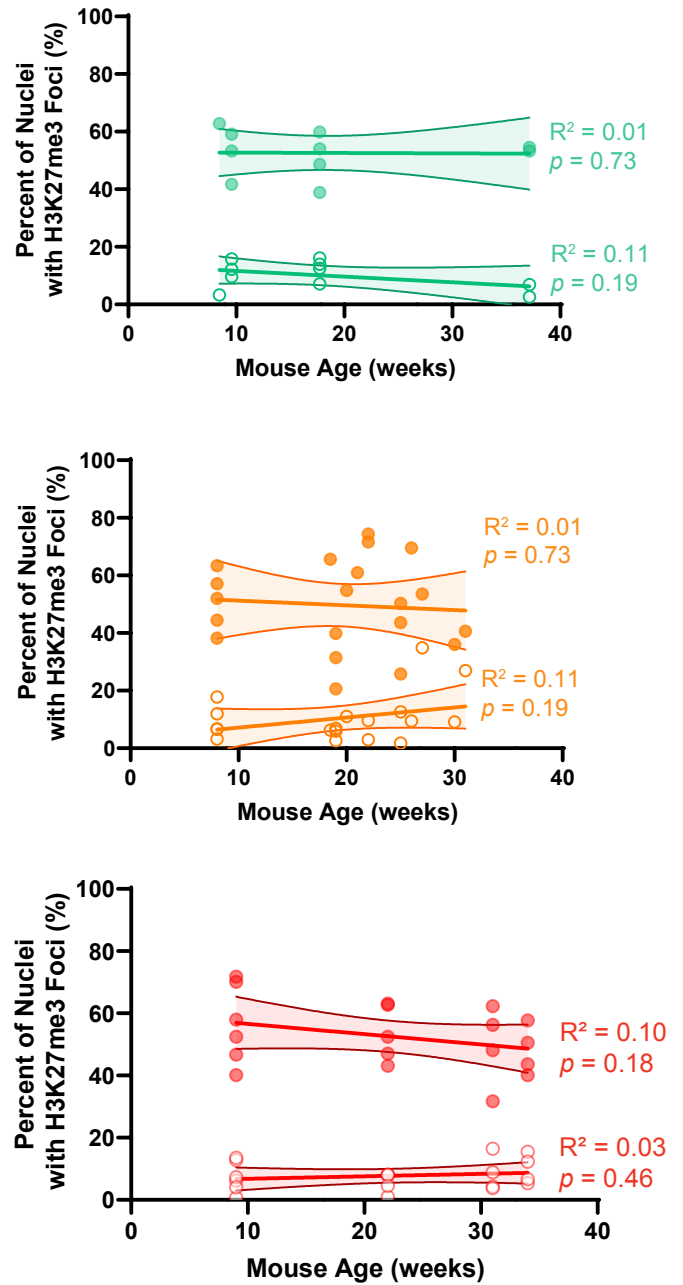

Supplementary Figure 3

Supplement: NIHMS1994708-supplement-supplemental_fig_3.pdf [file NIHMS1994708-supplement-supplemental_fig_3.pdf]
